# Supplementary material for: FeII complexes supported by an iminophosphorane ligand: synthesis and reactivity
Source: Royal Society of Chemistry journal article supplement (doi:10.1039/d3dt00950e), 2023-01-01
Supplement: d3dt00950e1.pdf [file d3dt00950e1.pdf]

## Synthesis of Iron(II) complexes supported by an Iminophosphorane ligand:

### Synthesis and Reactivity

Thibault Tannoux, Louis Mazaud, Thibault Cheisson, Nicolas Casaretto, Audrey Auffrant\*

Laboratoire de Chimie Moléculaire (LCM), CNRS, École Polytechnique, Institut Polytechnique de Paris,  
Route de Saclay, 91120 Palaiseau, France.

## Supporting Information

|                      |   |
|----------------------|---|
| 1. X-ray data .....  | 2 |
| 2. X-ray data .....  | 3 |
| 3. NMR spectra ..... | 4 |

## 1. X-ray data

**Table S1.** X-ray data for [LFeCl<sub>2</sub>], [LFe(CH<sub>3</sub>CN)<sub>3</sub>](OTf)<sub>2</sub>, [LFe(OTf)<sub>2</sub>]

| Compound               | [LFeCl <sub>2</sub> ]                                                                                             | [LFe(OTf) <sub>2</sub> ]                                                                                     | [LFe(CH <sub>3</sub> CN) <sub>3</sub> ](OTf) <sub>2</sub>                                                    |
|------------------------|-------------------------------------------------------------------------------------------------------------------|--------------------------------------------------------------------------------------------------------------|--------------------------------------------------------------------------------------------------------------|
| Molecular formula      | C <sub>37</sub> H <sub>32</sub> Cl <sub>2</sub> FeN <sub>2</sub> P <sub>2</sub> , C <sub>4</sub> H <sub>8</sub> O | C <sub>39</sub> H <sub>32</sub> F <sub>6</sub> FeN <sub>2</sub> O <sub>6</sub> P <sub>2</sub> S <sub>2</sub> | C <sub>47</sub> H <sub>44</sub> F <sub>6</sub> FeN <sub>6</sub> O <sub>6</sub> P <sub>2</sub> S <sub>2</sub> |
| Molecular weight       | 765.44                                                                                                            | 920.57                                                                                                       | 1084.79                                                                                                      |
| Space group            | P2 <sub>1</sub> /c                                                                                                | P2 <sub>1</sub> /n                                                                                           | Cc                                                                                                           |
| V(Å <sup>3</sup> )     | 3746.6(8)                                                                                                         | 4067.6(6)                                                                                                    | 4943.0(9)                                                                                                    |
| a (Å)                  | 15.4950(18)                                                                                                       | 11.8695(10)                                                                                                  | 10.2743(12)                                                                                                  |
| b (Å)                  | 15.9446(19)                                                                                                       | 23.485(2)                                                                                                    | 25.414(3)                                                                                                    |
| c (Å)                  | 16.3447(18)                                                                                                       | 14.6125(12)                                                                                                  | 18.9605(17)                                                                                                  |
| α (°)                  | 90                                                                                                                | 90                                                                                                           | 90                                                                                                           |
| β (°)                  | 111.904(3)                                                                                                        | 93.038(3)                                                                                                    | 93.233(4)                                                                                                    |
| γ (°)                  | 90                                                                                                                | 90                                                                                                           | 90                                                                                                           |
| Z                      | 4                                                                                                                 | 4                                                                                                            | 4                                                                                                            |
| d(g·cm <sup>-3</sup> ) | 1.357                                                                                                             | 1.503                                                                                                        | 1.458                                                                                                        |
| F(000)                 | 1592                                                                                                              | 1880                                                                                                         | 2232.0                                                                                                       |
| Θ <sub>max</sub>       | 27.482                                                                                                            | 27.537                                                                                                       | 28.282                                                                                                       |
| Rflns measd            | 56231                                                                                                             | 87342                                                                                                        | 46864                                                                                                        |
| Unique data            | 8576                                                                                                              | 9361                                                                                                         | 12064                                                                                                        |
| R <sub>int</sub>       | 0.1033                                                                                                            | 0.0505                                                                                                       | 0.0787                                                                                                       |
| wR <sub>2</sub>        | 0.1268                                                                                                            | 0.0881                                                                                                       | 0.1131                                                                                                       |
| R <sub>1</sub>         | 0.0547                                                                                                            | 0.0332                                                                                                       | 0.0515                                                                                                       |
| GoF                    | 1.030                                                                                                             | 1.096                                                                                                        | 1.046                                                                                                        |
| CCDC number            | 2227071                                                                                                           | 2227072                                                                                                      | 2227073                                                                                                      |

**Table S2.** X-ray data for [LFe(NC<sup>t</sup>Bu)<sub>3</sub>Cl<sub>2</sub>], [L<sup>\*</sup>FeCl(pyr)]

| Compound               | [LFe(NC <sup>t</sup> Bu) <sub>3</sub> Cl <sub>2</sub> ]                         | [L <sup>*</sup> FeCl(pyr)]                                        |
|------------------------|---------------------------------------------------------------------------------|-------------------------------------------------------------------|
| Molecular formula      | C <sub>53</sub> H <sub>61</sub> Cl <sub>4</sub> FeN <sub>5</sub> P <sub>2</sub> | C <sub>42</sub> H <sub>36</sub> ClFeN <sub>3</sub> P <sub>2</sub> |
| Molecular weight       | 1027.65                                                                         | 735.98                                                            |
| Space group            | P2 <sub>1</sub> /n                                                              | P2 <sub>1</sub> /c                                                |
| V(Å <sup>3</sup> )     | 5546(3)                                                                         | 3519.0(5)                                                         |
| a (Å)                  | 13.298(5)                                                                       | 12.9480(10)                                                       |
| b (Å)                  | 17.214(5)                                                                       | 10.1740(10)                                                       |
| c (Å)                  | 25.028(10)                                                                      | 26.9910(10)                                                       |
| α (°)                  | 90                                                                              | 90                                                                |
| β (°)                  | 104.507(13)                                                                     | 98.2320(10)                                                       |
| γ (°)                  | 90                                                                              | 90                                                                |
| Z                      | 4                                                                               | 4                                                                 |
| d(g·cm <sup>-3</sup> ) | 1.231                                                                           | 1.389                                                             |
| F(000)                 | 2152.0                                                                          | 1528                                                              |
| Θ <sub>max</sub>       | 26.029                                                                          | 25.025                                                            |
| Rflns measd            | 154394                                                                          | 20627                                                             |
| Unique data            | 10914                                                                           | 6153                                                              |
| R <sub>int</sub>       | 0.0745                                                                          | 0.0576                                                            |
| wR <sub>2</sub>        | 0.1352                                                                          | 0.1123                                                            |
| R <sub>1</sub>         | 0.0511                                                                          | 0.0595                                                            |
| GoF                    | 1.073                                                                           | 1.117                                                             |
| CCDC number            | 2227074                                                                         | 2227075                                                           |

**Table S3.** Comparison of bond lengths between [Fe(PPyNP)(CH<sub>3</sub>CN)<sub>3</sub>](OTf)<sub>2</sub>, [Fe(PPyNP)(OTf)<sub>2</sub>], and [LFe(CNtBu)<sub>3</sub>](Cl)<sub>2</sub>

| Bond lengths (Å) | <b>2</b>   | [Fe(PPyNP)(OTf) <sub>2</sub> ]<br><b>3</b> | [Fe(NPyNP)(CNtBu) <sub>3</sub> Cl <sub>2</sub> ]<br><b>4'</b> |
|------------------|------------|--------------------------------------------|---------------------------------------------------------------|
| Fe1-N2           | 1.972(4)   | 2.1972(14)                                 | 1.992(2)                                                      |
| Fe1-P2           | 2.2338(15) | 2.4733(5)                                  | 2.2035(8)                                                     |
| Fe1-N1           | 2.060(4)   | 2.0499(15)                                 | 2.055(2)                                                      |
| P1-N1            |            | 1.6097(15)                                 | 1.604(2)                                                      |

## 2. X-ray data

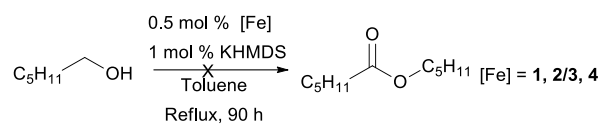

**Scheme S1:** Catalytic attempts of dehydrogenative coupling of hexan-1-ol

### 3. NMR spectra

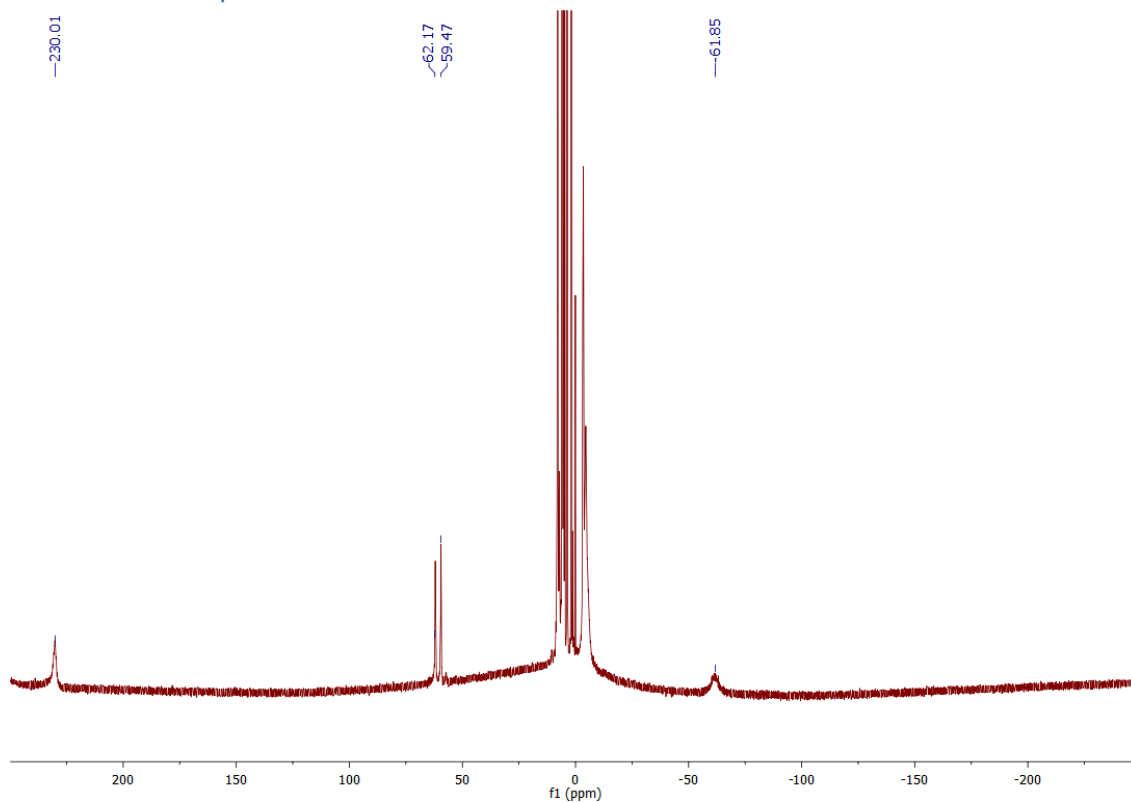

Figure S1:  $^1\text{H}$  NMR spectrum of  $[\text{Fe}(\text{PPyNP})\text{Cl}_2]$  in  $\text{CD}_2\text{Cl}_2$ .

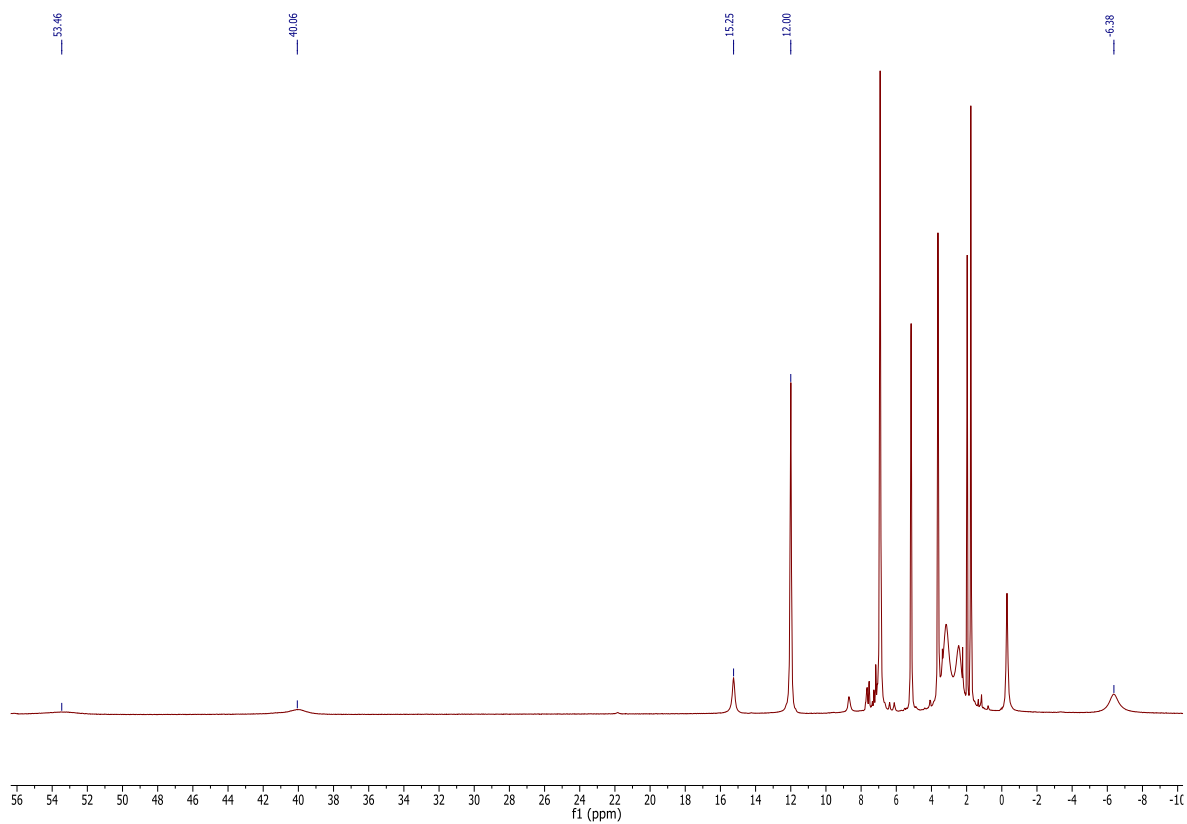

Figure S2:  $^1\text{H}$  NMR spectrum of  $[\text{Fe}(\text{PPyNP})(\text{OTf})_2]/[\text{Fe}(\text{PPyNP})(\text{CH}_3\text{CN})_3](\text{OTf})_2$  in  $\text{CD}_3\text{CN}$ .

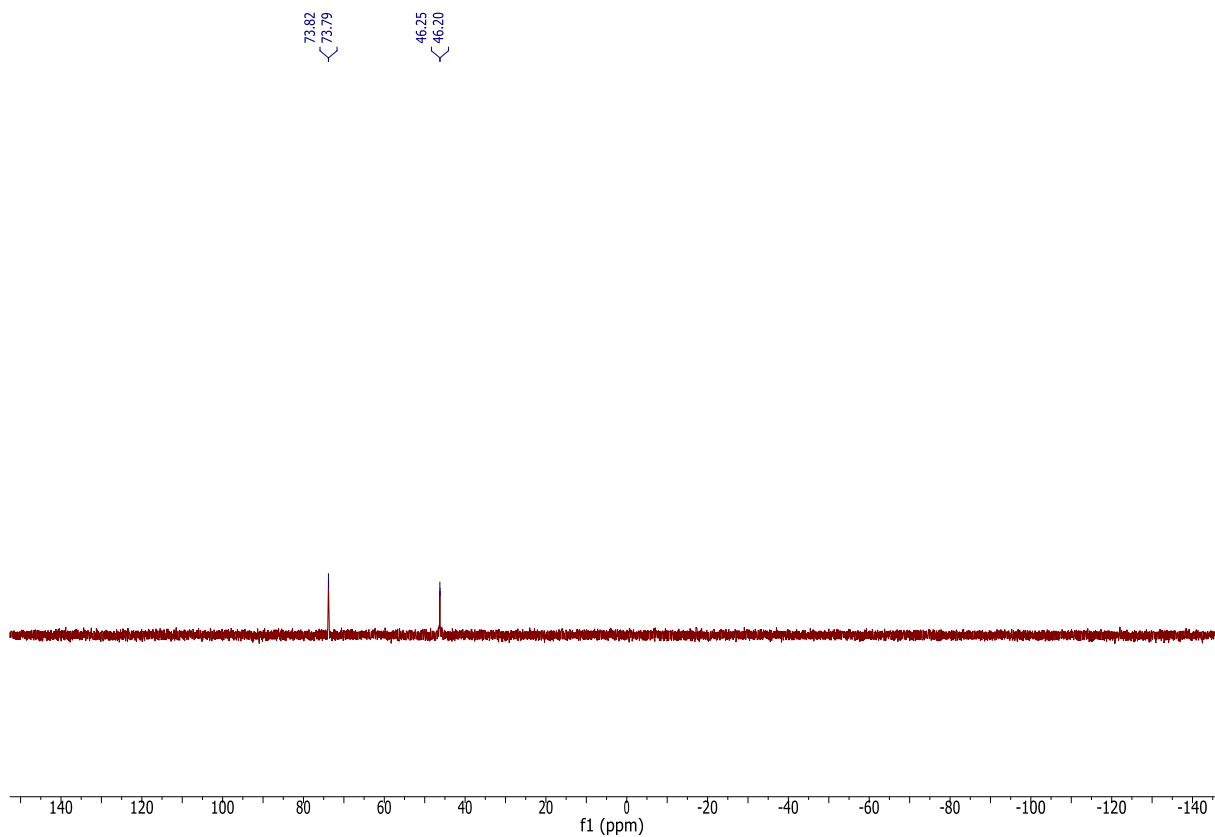

Figure S3:  $^{13}\text{P}\{^1\text{H}\}$  NMR spectrum of  $[\text{Fe}(\text{PPyNP})(\text{NC}^t\text{Bu})_3](\text{OTf})_2$  in  $\text{CD}_2\text{Cl}_2$

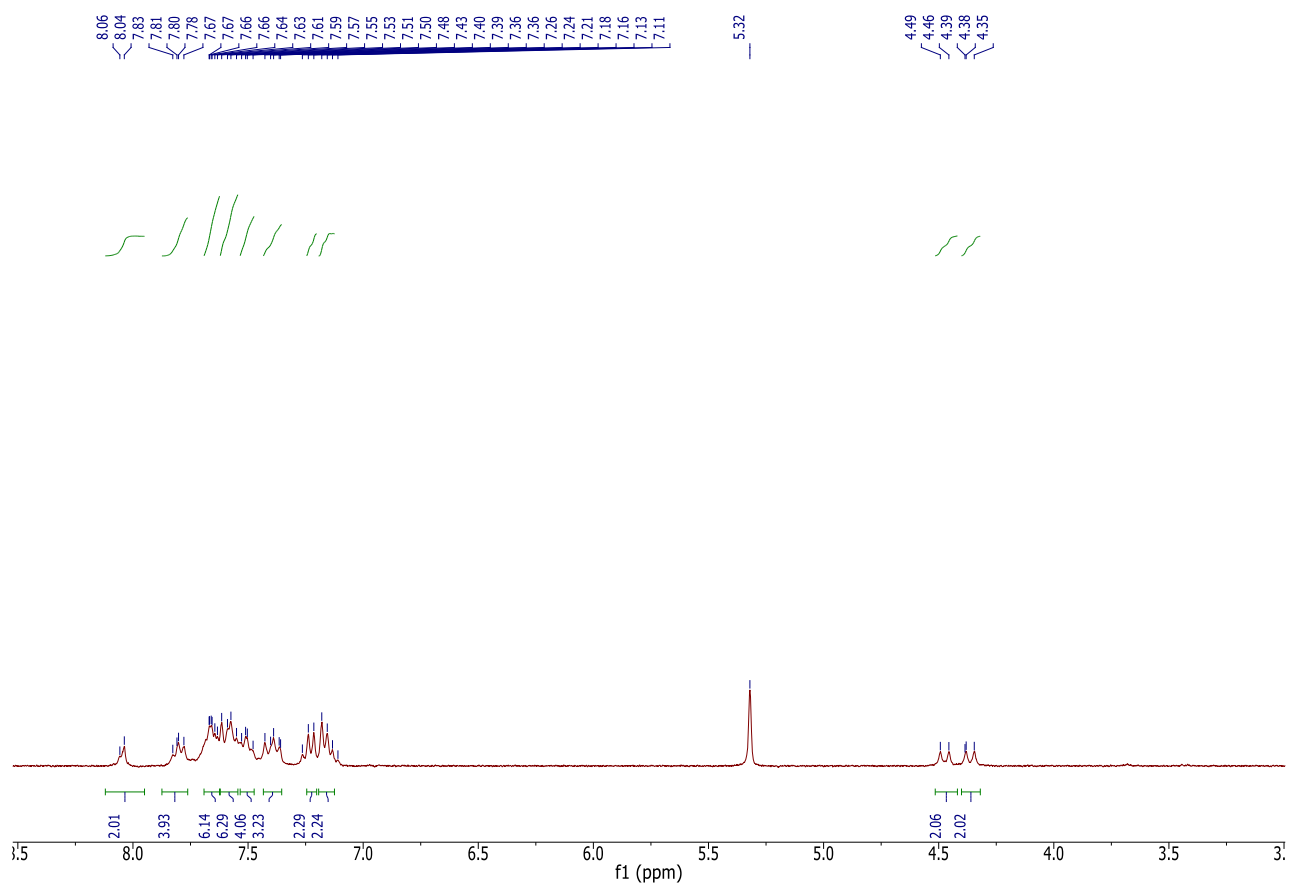

Figure S4:  $^1\text{H}$  NMR spectrum of  $[\text{Fe}(\text{PPyNP})(\text{NC}^t\text{Bu})_3](\text{OTf})_2$  in  $\text{CD}_2\text{Cl}_2$

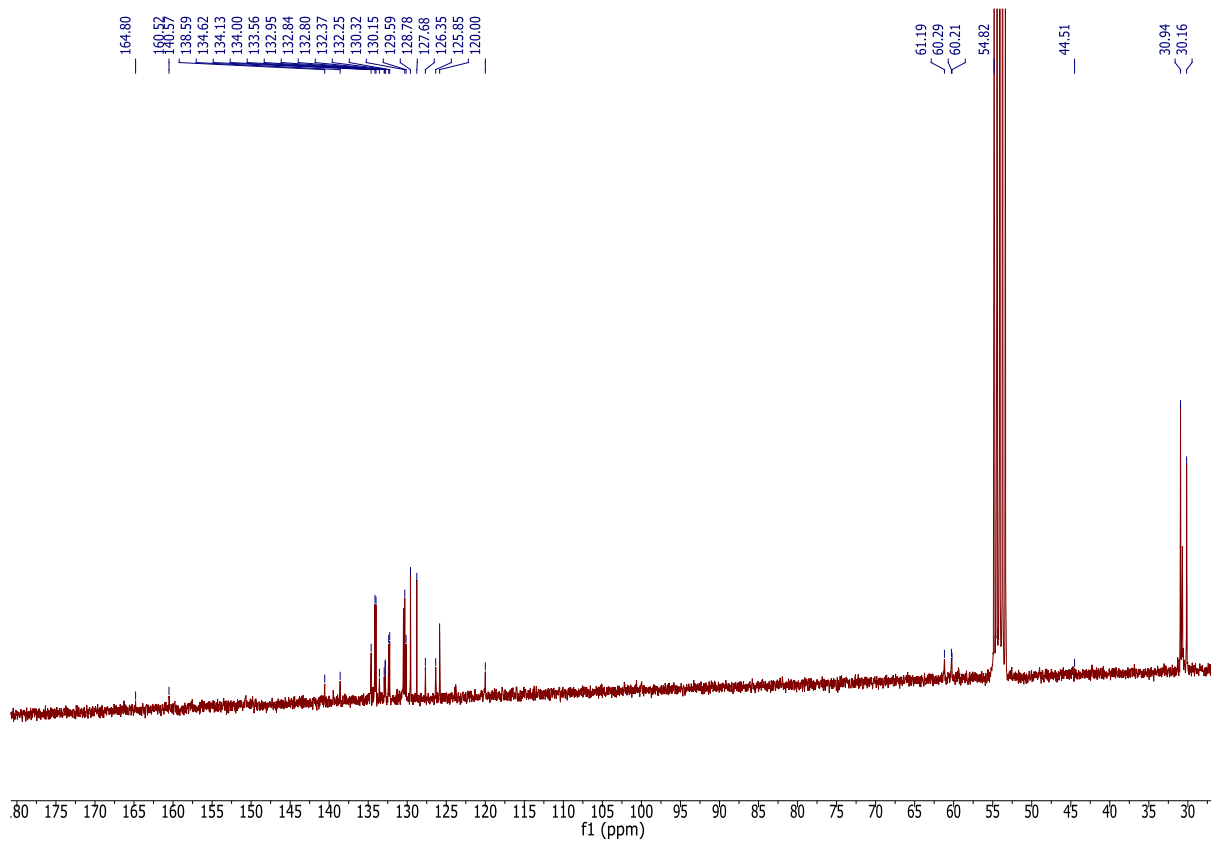

Figure S5:  $^{13}\text{C}$  NMR spectrum of  $[\text{Fe}(\text{PPyNP})(\text{NC}^t\text{Bu})_3](\text{OTf})_2$  in  $\text{CD}_2\text{Cl}_2$

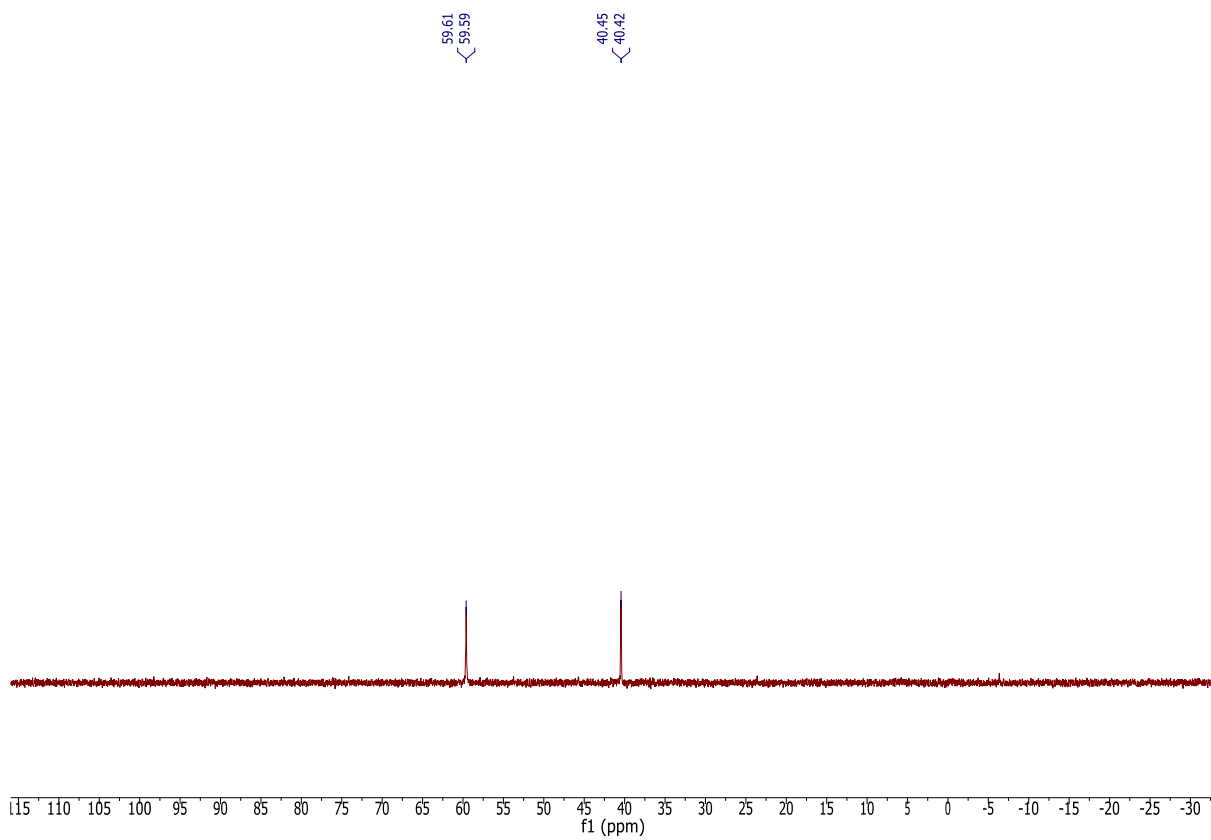

Figure S6:  $^{31}\text{P}\{^1\text{H}\}$  NMR spectrum of  $[\text{Fe}(\text{PPyNP})^*(\text{NC}^t\text{Bu})_3](\text{OTf})$  in  $\text{THF-d}_8$

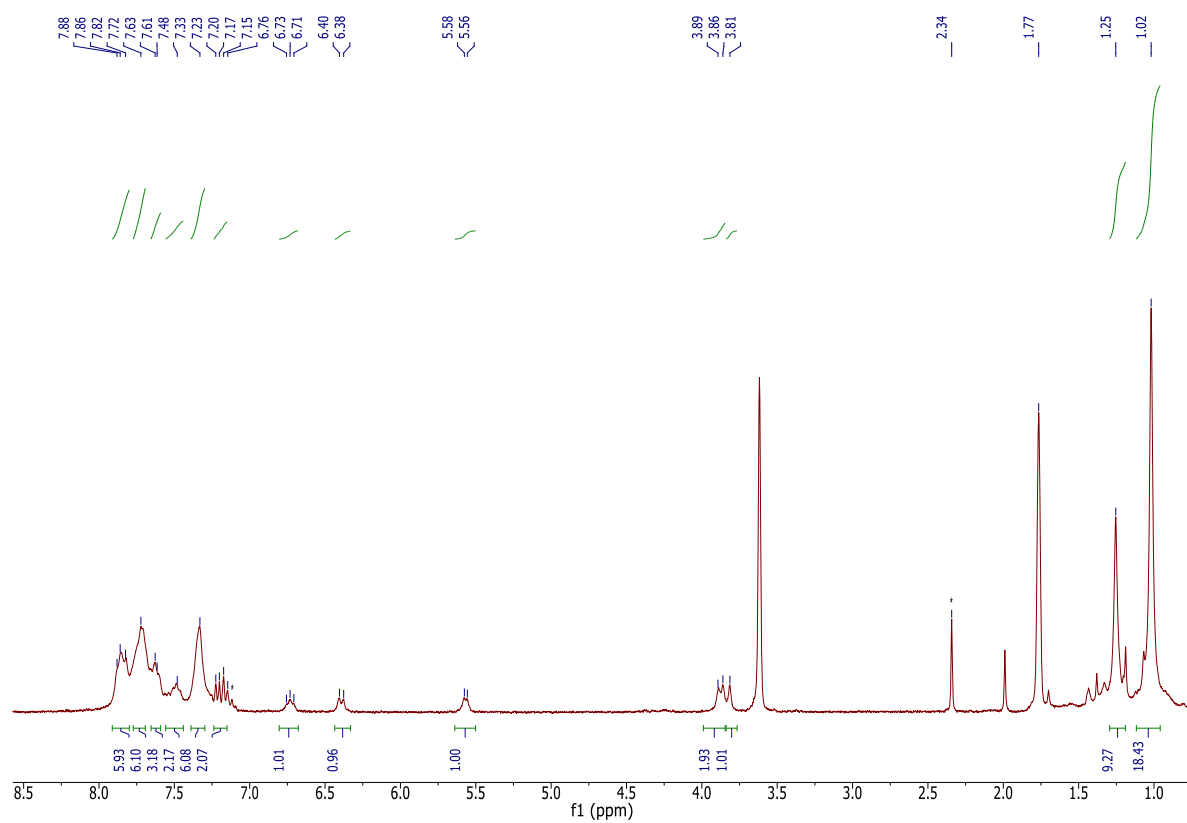

Figure S7:  $^1\text{H}$  NMR spectrum of  $[\text{Fe}(\text{PPyNP})^*(\text{NC}^t\text{Bu})_3](\text{OTf})$  in  $\text{THF-d}_8$

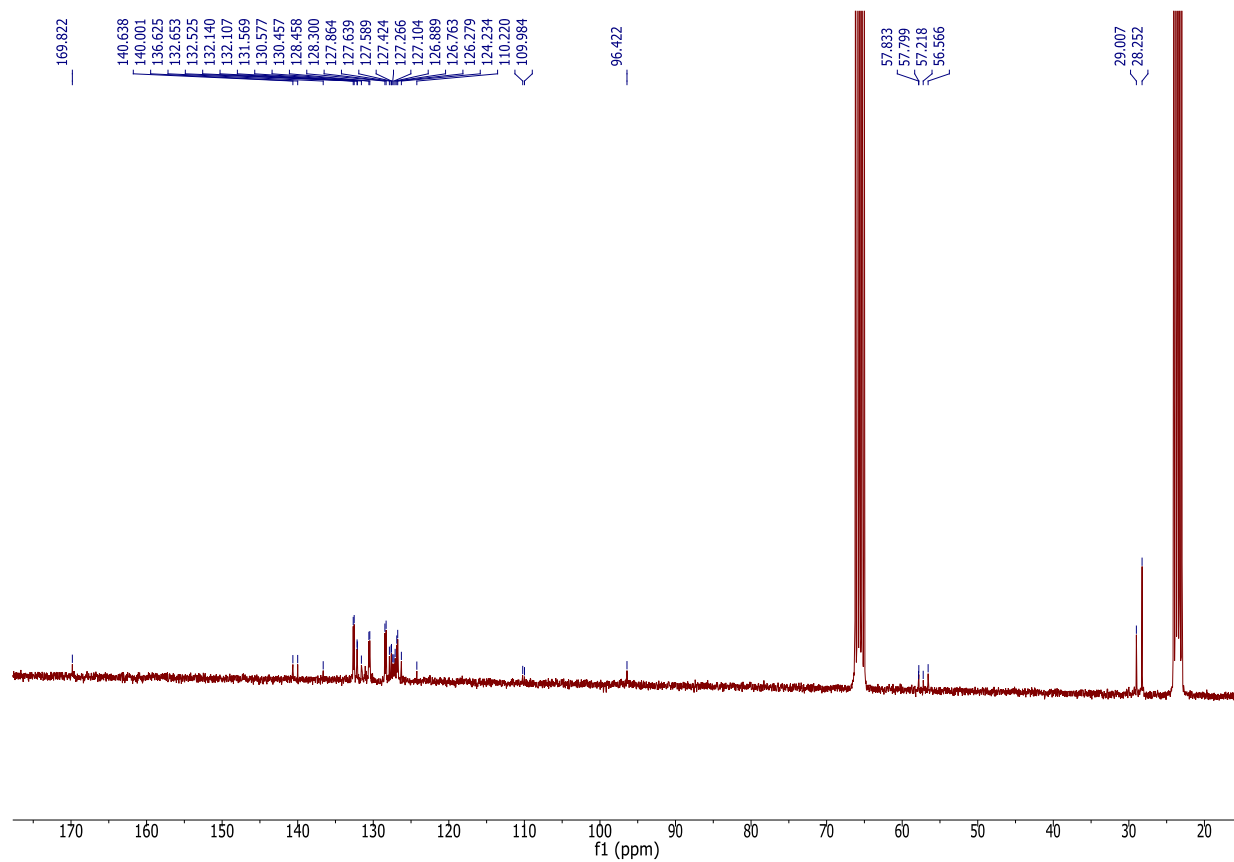

Figure S8:  $^{13}\text{C}$  NMR spectrum of  $[\text{Fe}(\text{PPyNP})^*(\text{NC}^t\text{Bu})_3](\text{OTf})$  in  $\text{THF-d}_8$

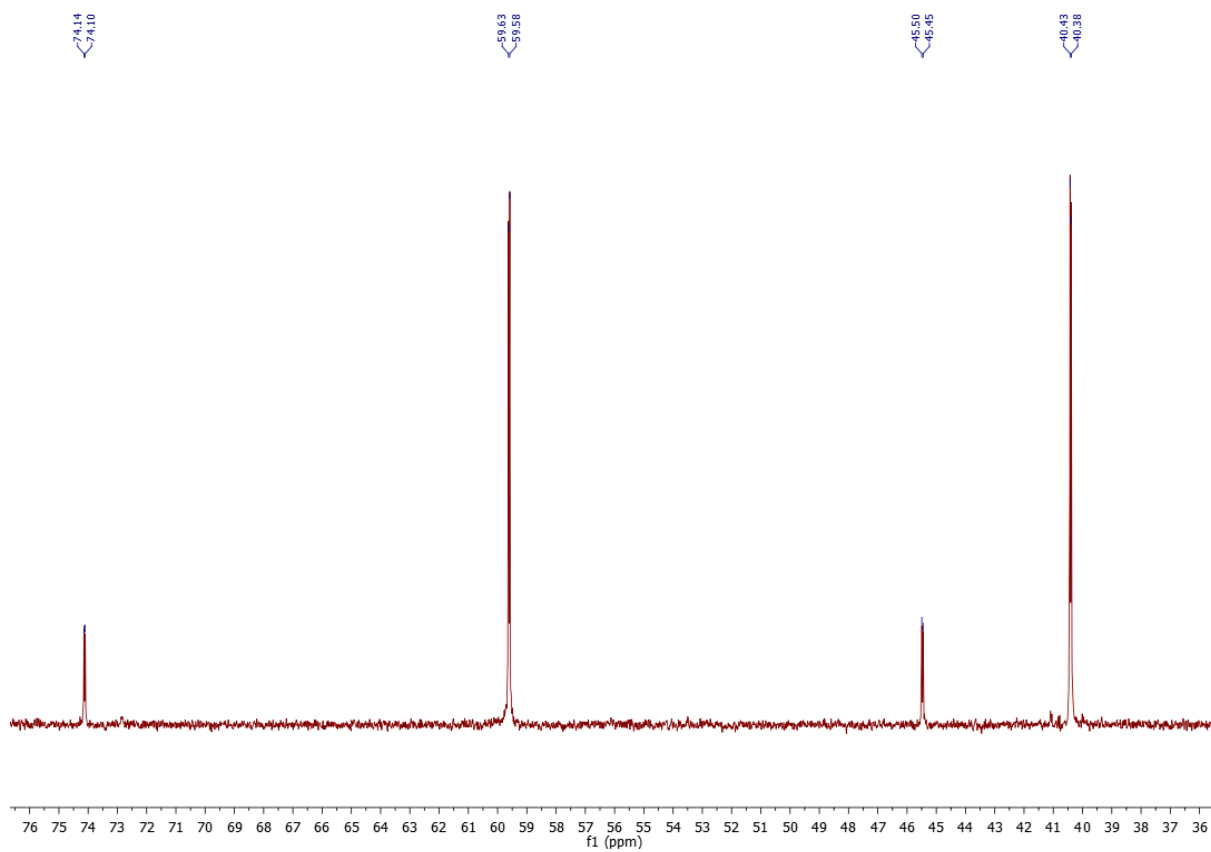

Figure S9:  $^{31}\text{P}\{^1\text{H}\}$  NMR spectrum of a mixture of  $[\text{Fe}(\text{PPyNP})^*(\text{NC}^t\text{Bu})_3](\text{OTf})$  and  $[\text{Fe}(\text{PPyNP})^*(\text{NC}^t\text{Bu})_3](\text{OTf})$  in  $\text{THF-d}_8$  after removal of volatiles.
